# Supplementary material for: Neoantigens Derived from Recurrently Mutated Genes as Potential Immunotherapy Targets for Gastric Cancer
Source: Biomed Res Int. 2019 Jun 13;2019:8103142. doi: 10.1155/2019/8103142 (PMC6595338; doi:10.1155/2019/8103142)
Supplement: Supplementary 1 — Additional file 1: Table S1: the distribution of 40 recurrently mutated genes in 32 GC patients. [file 8103142.f1.xlsx]

## Sheet: tableS2
Table S1: The distribution of 40 recurrently mutated genes in 32 GC patients
Gene	Patients Number	Total mutation number
MUC4	30	254
TTN	17	28
PRR21	11	13
CDC27	11	13
MUC16	10	18
PABPC1	9	17
TP53	9	9
SYNE1	8	11
LRP1B	8	9
DGKZ	7	8
KRTAP9-2	7	8
RBMX	7	13
NBPF10	7	10
PCDHB16	6	7
PREX2	6	6
FAT4	6	10
HERC2	6	8
NBPF8	6	7
SPTA1	6	7
ADAM21	6	6
MUC5B	6	7
ANKRD36	6	10
TPRX1	5	6
PCLO	5	7
PCDHA3	5	8
NEB	5	7
CACNA1C	5	6
HRNR	5	7
SLC25A5	5	8
TENM4	5	5
PI4KA	5	6
ADAMTS7	5	7
DNAH9	5	5
FLG	5	5
CSMD3	5	5
MUC7	5	5
SACS	5	6
SSC5D	5	7
MUC12	5	7
CRB1	5	5
